# Supplementary material for: Neurotransmitter classification from electron microscopy images at synaptic sites in Drosophila melanogaster
Source: PubMed Central journal article supplement (PMC11106717; doi:10.1016/j.cell.2024.03.016), 2024-05-09
Supplement: mmc1.pdf [file mmc1.pdf]

Cell, Volume 187

## Supplemental information

### Neurotransmitter classification from electron microscopy images at synaptic sites in *Drosophila melanogaster*

Nils Eckstein, Alexander Shakeel Bates, Andrew Champion, Michelle Du, Yijie Yin, Philipp Schlegel, Alicia Kun-Yang Lu, Thomson Rymer, Samantha Finley-May, Tyler Paterson, Ruchi Parekh, Sven Dorkenwald, Arie Matsliah, Szi-Chieh Yu, Claire McKellar, Amy Sterling, Katharina Eichler, Marta Costa, Sebastian Seung, Mala Murthy, Volker Hartenstein, Gregory S.X.E. Jefferis, and Jan Funke

## Supplemental References

- S1. Schneider-Mizell, C. M., Gerhard, S., Longair, M., Kazimiers, T., Li, F., Zwart, M. F., Champion, A., Midgley, F. M., Fetter, R. D., Saalfeld, S., Cardona, A. (2016). Quantitative neuroanatomy for connectomics in drosophila. *Elife*, 5:e12059.
- S2. Schlegel, P., Yin, Y., Bates, A. S., Dorkenwald, S., Eichler, K., Brooks, P., Han, D. S., Gkantia, M., dos Santos, M., Munnely, E. J., et al (2023). A consensus cell type atlas from multiple connectomes reveals principles of circuit stereotypy and variation. Preprint at bioRxiv 10.1101/2023.06.27.546055
- S3. Ito, M., Masuda, N., Shinomiya, K., Endo, K., and Ito, K. (2013). Systematic analysis of neural projections reveals clonal composition of the Drosophila brain. *Curr. Biol.*, 23:644–655.
- S4. Lovick, J. K., Ngo, K. T., Omoto, J. J., Wong, D. C., Nguyen, J. D., and Hartenstein, V. (2013). Postembryonic lineages of the Drosophila brain: I. development of the lineage-associated fiber tracts. *Dev. Biol.*, 384:228–257.
- S5. Wong, D. C., Lovick, J. K., Ngo, K. T., Borisuthirattana, W., Omoto, J. J., and Hartenstein, V. (2013). Postembryonic lineages of the Drosophila brain: II. identification of lineage projection patterns based on MARCM clones. *Dev. Biol.*, 384:258–289.
- S6. Yu, H.-H., Awasaki, T., Schroeder, M. D., Long, F., Yang, J. S., He, Y., Ding, P., Kao, J.-C., Wu, G. Y.-Y., Peng, H., et al (2013). Clonal development and organization of the adult Drosophila central brain. *Curr. Biol.*, 23, 633, 643.
- S7. Dorkenwald, S., McKellar, C. E., Macrina, T., Kemnitz, N., Lee, K., Lu, R., Wu, J., Popovych, S., Mitchell, E., Nehoran, B., et al (2022). FlyWire: online community for whole-brain connectomics. *Nat. Methods*, 19:119–128.
